# Supplementary material for: Multilocus phylogenetic analyses reveal unexpected abundant diversity and significant disjunct distribution pattern of the Hedgehog Mushrooms (Hydnum L.)
Source: PubMed Central journal article supplement (PMC4858670; doi:10.1038/srep25586), 2016-05-06
Supplement: srep25586-s1.pdf [file srep25586-s1.pdf]

**Multilocus phylogenetic analyses reveal unexpected abundant diversity and significant disjunct distribution pattern of the Hedgehog Mushrooms (*Hydnum* L.)**

Bang Feng<sup>1</sup> Xiang-Hua Wang<sup>1</sup> David Ratkowsky<sup>2</sup> Genevieve Gates<sup>2</sup> Su See Lee<sup>3</sup> Tine Grebenc<sup>4</sup> Zhu L. Yang<sup>1\*</sup>

1 Key Laboratory for Plant Diversity and Biogeography of East Asia, Kunming Institute of Botany, Chinese Academy of Sciences, Kunming, China

2 Tasmanian Institute of Agriculture, and School of Plant Science, University of Tasmania, Hobart, Tasmania, Australia

3 Tanarimba, Janda Baik, Bentong 28750 Bentong, Pahang, Malaysia

4 Slovenian Forestry Institute, Večna pot 2, SI-1000 Ljubljana, Slovenia

\*Correspondence: Zhu L. Yang, Key Laboratory for Plant Diversity and Biogeography of East Asia, Kunming Institute of Botany, Chinese Academy of Sciences, Kunming 650201, Yunnan, China, [fungi@mail.kib.ac.cn](mailto:fungi@mail.kib.ac.cn)

Table S1 Specimens used for phylogenetic analyses and the GenBank accessions for the sequences generated in this study.

| Taxon                    | Collection ID | Herbarium ID  | Location                                                       | GenBank Accessions |          |          |          |
|--------------------------|---------------|---------------|----------------------------------------------------------------|--------------------|----------|----------|----------|
|                          |               |               |                                                                | ITS                | nrLSU    | rpb1     | tef1a    |
| <i>H. crocidens</i>      | —             | PDD93278      | New Zealand: Auckland, Hunua, Workman Road, Workman Track      | KU612632           |          |          |          |
| <i>H. crocidens</i>      | —             | PERTH08072965 | Australia: About 100m south of Rosa Brook, near Marganet River | KU612630           | KU612685 |          |          |
| <i>H. crocidens</i>      | —             | PERTH08095981 | Australia: Augusta, west of Bussell Highway, Donovan Bushland  | KU612631           | KU612684 |          | KU612797 |
| <i>H. elatum</i>         | —             | FRI61322      | Malaysia: Trail to Tower, Huran Simpan Keal Pasoh              | KU612639           |          |          |          |
| <i>H. elatum</i>         | —             | FRI61713      | Malaysia: Tasik Bera Pahang-Taman Herba                        | KU612634           |          |          |          |
| <i>H. elatum</i>         | —             | FRI62150      | Malaysia: Hutan Ramsah, Felda Selatan 3                        | KU612638           | KU612692 |          | KU612812 |
| <i>H. elatum</i>         | —             | FRI62309      | Malaysia: Kampung Jelawat-Tasik Bera Pahang                    | KU612637           | KU612691 | KU612755 | KU612811 |
| <i>H. elatum</i>         | —             | FRI62814      | Malaysia : H/S, Pasoh Nature Trail                             | KU612636           | KU612693 |          |          |
| <i>H. elatum</i>         | Hao Yang      | HKAS92352     | Singapore                                                      | KU612633           |          | KU612756 | KU612810 |
| <i>H. elatum</i>         | —             | FRI62317      | Malaysia: Tasik Bera Pahang-Taman Herba                        | KU612635           | KU612694 |          |          |
| <i>H. elliposporum</i>   | —             | HMJAU5985     | China: Jilin Province, Antu County, Changbai Mountain          | KU612602           |          |          |          |
| <i>H. elliposporum</i>   | Yang M22      | HKAS93254     | Germany                                                        | KU612604           |          | KU612726 | KU612791 |
| <i>H. elliposporum</i>   | Yang M31      | HKAS93255     | Germany                                                        | KU612605           |          |          |          |
| <i>H. elliposporum</i>   | Yang4993      | HKAS56491     | Germany                                                        | KU612603           |          |          |          |
| <i>H. magnorufescens</i> | —             | HMJAU4677     | Russia: Kyrov, Belaya Holunitsa                                | KU612550           |          |          |          |
| <i>H. magnorufescens</i> | 161209        | —             | Slovenia                                                       | KU612549           | KU612669 | KU612700 | KU612795 |
| <i>H. ovoideisporum</i>  | 071106        | —             | Slovenia                                                       | KU612536           |          | KU612711 |          |
| <i>H. repandum</i>       | KR9177        | —             | Germany                                                        | KU612575           |          |          |          |
| <i>H. repandum</i>       | Yang M21      | HKAS93253     | Germany                                                        | KU612581           |          | KU612731 | KU612769 |
| <i>H. repandum</i>       | 161209B       | —             | Slovenia                                                       | KU612580           |          |          |          |
| <i>H. repandum</i>       | 161209A       | —             | Slovenia                                                       | KU612578           |          |          |          |
| <i>H. repandum</i>       | 231109B       | —             | Slovenia                                                       | KU612577           |          |          |          |
| <i>H. repandum</i>       | 251209        | —             | Slovenia                                                       | KU612579           |          |          |          |

|                     |               |           |                                                                            |          |          |          |          |
|---------------------|---------------|-----------|----------------------------------------------------------------------------|----------|----------|----------|----------|
| <i>H. repandum</i>  | 031209C       | —         | Slovenia                                                                   | KU612576 |          |          |          |
| <i>H. repandum</i>  | 031209A       | —         | Slovenia                                                                   | KU612574 | KU612655 | KU612732 | KU612770 |
| <i>H. repandum</i>  | Yang5120      | HKAS54416 | China: Jilin Province, Antu County, Changbai Mountain                      | KU612583 |          |          |          |
| <i>H. repandum</i>  | Wang3596      | HKAS92333 | Sweden: Oestersund, Sandviken, Fillstabaacken Nature Reserve               | KU612582 |          |          |          |
| <i>H. rufescens</i> | Li1388        | HKAS56228 | China: Jilin Province                                                      | KU612540 |          |          |          |
| <i>H. rufescens</i> | Feng609       | HKAS57338 | China: Tibet, Jiangda county, Guopubaizong Mountain                        | KU612542 |          |          |          |
| <i>H. rufescens</i> | Shi585        | HKAS92339 | China: Heilongjiang Province, Yichun County, Tangwang River Nature Reserve | KU612537 | KU612658 | KU612712 | KU612783 |
| <i>H. rufescens</i> | Shi468        | HKAS92338 | China: Jilin Province, Antu County, Changbai Mountain                      | KU612538 | KU612659 | KU612713 | KU612784 |
| <i>H. rufescens</i> | Feng1423      | HKAS82529 | China: Tibet Autonomous Region, Changdu County, Lamei                      | KU612541 | KU612657 | KU612714 | KU612781 |
| <i>H. rufescens</i> | Wang3598      | HKAS92337 | Sweden: Oestersund, Sandviken, Fillstabaacken Nature Reserve               | KU612539 | KU612656 | KU612725 | KU612780 |
| <i>H. rufescens</i> | Feng1433      | HKAS82539 | China: Sichuan Province, Dege County, Manigange                            |          |          | KU612715 | KU612782 |
| <i>H. sp.</i>       | Feng656       | HKAS57385 | China: Yunnan Province, Shangeri-La County, Bitu Lake                      | KU612601 |          |          |          |
| <i>H. sp.</i>       | —             | F1110834  | Costa Rica: Cartago, Estrella                                              | KU612598 |          |          |          |
| <i>H. sp.</i>       | —             | F1104787  | USA: Michigan, Manistee County                                             | KU612606 |          |          |          |
| <i>H. sp.</i>       | Wang2369      | HKAS61337 | China: Hunan Province, Zhangjiajie                                         | KU612597 | KU612644 | KU612699 | KU612759 |
| <i>H. sp.</i>       | —             | FRI62832  | Malaysia: H/S Pasoh-Denai Alam                                             | KU612625 |          |          |          |
| <i>H. sp.</i>       | GD1586        | —         | Australia: Tasmania, Zig-Zag Track                                         |          |          | KU612750 | KU612807 |
| <i>H. sp.</i>       | Feng1269      | HKAS82411 | China: Taiwan, Nantu County, Hohuan Mountain                               | KU612607 | KU612668 | KU612728 | KU612793 |
| <i>H. sp. 1</i>     | 231109        | —         | Slovenia                                                                   | KU612545 | KU612660 | KU612716 | KU612794 |
| <i>H. sp. 2</i>     | G. Michalenko | F1187537  | Canada: Alberta, Jasper Park County                                        | KU612544 |          |          |          |
| <i>H. sp. 2</i>     | Shi613        | HKAS92340 | China: Heilongjiang Province, Daxing'anling                                | KU612543 | KU612661 | KU612717 | KU612779 |
| <i>H. sp. 3</i>     | Li1274        | HKAS56128 | China: Yunnan Province, Yulong County                                      | KU612526 |          |          |          |
| <i>H. sp. 3</i>     | Tang924       | HKAS56881 | China: Yunnan Province, Changning County                                   | KU612530 |          |          |          |
| <i>H. sp. 3</i>     | Wu158         | HKAS57690 | China: Yunnan Province                                                     | KU612527 |          |          |          |
| <i>H. sp. 3</i>     | Feng693       | HKAS57422 | China: Yunnan Province, Yulong County                                      | KU612529 |          |          |          |

|                 |                     |           |                                                          |          |          |          |          |
|-----------------|---------------------|-----------|----------------------------------------------------------|----------|----------|----------|----------|
| <i>H. sp. 3</i> | Feng746             | HKAS57475 | China: Yunnan Province, Jianchuan County                 | KU612528 | KU612666 | KU612722 | KU612796 |
| <i>H. sp. 3</i> | Wang2594            | HKAS61795 | China: Heilongjiang Province, Mulan County, Youyi        | KU612531 | KU612665 | KU612718 | KU612776 |
| <i>H. sp. 3</i> | Feng1090            | HKAS74570 | China: Yunnan Province, Tengchong County, Houqiao        | KU612522 |          |          |          |
| <i>H. sp. 3</i> | Feng1121            | HKAS74602 | China: Yunnan Province, Baoshan, Longyang                | KU612532 |          |          |          |
| <i>H. sp. 3</i> | Feng1123            | HKAS74604 | China: Yunnan Province, Baoshan, Longyang                | KU612533 |          |          |          |
| <i>H. sp. 3</i> | Feng1162            | HKAS74643 | China: Yunnan Province, Lanping County, Hexi             | KU612523 |          |          |          |
| <i>H. sp. 3</i> | Qin433              | HKAS77834 | China: Hunan Province, Shunhuangshan Natural Forest Park | KU612525 | KU612667 | KU612721 |          |
| <i>H. sp. 3</i> | Feng1375            | HKAS93262 | China: Yunnan Province, Jingdong County, Ailao Mountain  | KU612524 |          | KU612724 |          |
| <i>H. sp. 3</i> | Fan YG-1            | HKAS92348 | China: Jilin Province                                    |          | KU612664 | KU612719 | KU612777 |
| <i>H. sp. 3</i> | Fan YG-2            | HKAS93256 | China: Jilin Province                                    |          |          | KU612720 | KU612778 |
| <i>H. sp. 4</i> | Siyi Li 31          | F1125199  | USA: Wisconsin, Walworth County, LaGrange east loop      | KU612534 |          |          |          |
| <i>H. sp. 4</i> | EK Karczynski<br>42 | F1188749  | USA: Illinois, Cook County                               | KU612535 | KU612663 | KU612723 | KU612785 |
| <i>H. sp. 6</i> | NAMA 2008-<br>011   | F1186911  | USA: Idaho, Adams County, McCall Hall Ranch              | KU612548 | KU612662 | KU612703 | KU612775 |
| <i>H. sp. 6</i> | Yang4390            | HKAS45769 | China: Tibet Autonomous Region, Leiwuqi County, Binda    | KU612547 |          | KU612701 | KU612773 |
| <i>H. sp. 6</i> | Feng1402            | HKAS82508 | China: Tibet Autonomous Region, Mangkang County, Rumei   | KU612546 | KU612670 | KU612702 | KU612774 |
| <i>H. sp. 7</i> | Feng209             | HKAS55319 | China: Yunnan Province, Mengla County, Menglun           | KU612590 |          |          |          |
| <i>H. sp. 7</i> | Feng210             | HKAS55320 | China: Yunnan Province, Mengla County, Menglun           | KU612591 |          |          |          |
| <i>H. sp. 7</i> | Zeng158             | HKAS93257 | China: Yunnan Province                                   | KU612588 |          |          |          |
| <i>H. sp. 7</i> | Feng11              | HKAS51070 | China: Yunnan Province, Jingdong County, Ailao Mountain  | KU612584 |          |          |          |
| <i>H. sp. 7</i> | Feng12              | HKAS51071 | China: Yunnan Province, Jingdong County, Ailao Mountain  | KU612585 |          |          |          |
| <i>H. sp. 7</i> | Feng13              | HKAS51072 | China: Yunnan Province, Jingdong County, Ailao Mountain  | KU612586 |          |          |          |
| <i>H. sp. 7</i> | Feng29              | HKAS51088 | China: Yunnan Province, Kunming, Qiongzhu Temple         | KU612587 |          |          |          |
| <i>H. sp. 7</i> | Li Fang 1177        | HKAS78334 | China: Guangdong Province, Fengkai County, Heishiding    | KU612589 |          | KU612733 | KU612768 |

|                  |             |           |                                                                |          |          |          |          |
|------------------|-------------|-----------|----------------------------------------------------------------|----------|----------|----------|----------|
| <i>H. sp. 8</i>  | Feng299     | HKAS55410 | China: Yunnan Province, Shangeri-La County, Haba Snow Mountain | KU612596 | KU612654 | KU612729 | KU612771 |
| <i>H. sp. 8</i>  | Feng338     | HKAS55449 | China: Yunnan Province, Shangeri-La County, Daxue Mountain     | KU612594 |          |          |          |
| <i>H. sp. 8</i>  | Wu235       | HKAS57767 | China: Yunnan Province, Yulong County, Laojun Mountain         | KU612592 |          |          |          |
| <i>H. sp. 8</i>  | Feng783     | HKAS68574 | China: Yunnan Province, Yulong County, Laojun Mountain         | KU612593 |          |          |          |
| <i>H. sp. 8</i>  | Feng1452    | HKAS82558 | China: Sichuan Province, Hongyuan County                       | KU612595 |          | KU612730 | KU612772 |
| <i>H. sp. 9</i>  | ER Ewald 67 | F1188765  | USA: Indiana, Porter County                                    | KU612599 | KU612653 | KU612741 |          |
| <i>H. sp. 10</i> | Feng217     | HKAS55327 | China: Yunnan Province, Jingdong County, Ailao Mountain        | KU612568 | KU612682 | KU612737 |          |
| <i>H. sp. 10</i> | Zhao185     | HKAS93260 | China: Yunnan Province                                         | KU612572 |          |          |          |
| <i>H. sp. 10</i> | Tang829     | HKAS56789 | China: Yunnan Province, Yingjiang County, Xima                 | KU612571 | KU612680 | KU612736 | KU612766 |
| <i>H. sp. 10</i> | Tang941     | HKAS56898 | China: Yunnan Province, Changning County                       | KU612570 |          |          |          |
| <i>H. sp. 10</i> | Feng1062    | HKAS74541 | China: Yunnan Province, Tengchong County, Houqiao              | KU612566 |          |          |          |
| <i>H. sp. 10</i> | Feng1268    | HKAS82410 | China: Taiwan, Nantu County, Hohuan Mountain                   | KU612573 | KU612679 | KU612734 | KU612765 |
| <i>H. sp. 10</i> | Feng1365    | HKAS93261 | China: Yunnan Province, Jingdong County, Ailao Mountain        | KU612567 | KU612681 | KU612735 | KU612767 |
| <i>H. sp. 10</i> | Wang3461    | HKAS92334 | China: Yunnan Province, on the way from Ninger to Puer         | KU612569 |          |          |          |
| <i>H. sp. 11</i> | —           | F1185236  | USA: West Virginia, Raleigh County, Beaver                     | KU612600 |          |          |          |
| <i>H. sp. 12</i> | Zeng452     | HKAS93258 | China: Hainan                                                  | KU612618 | KU612677 | KU612743 | KU612763 |
| <i>H. sp. 12</i> | XB-1        | HKAS92345 | China: Chongqing, Nanchuan County, Jinfo Mountain              | KU612619 | KU612676 | KU612742 | KU612764 |
| <i>H. sp. 13</i> | Wu182       | HKAS57714 | China: Yunnan Province, Jianchuan County                       | KU612617 | KU612673 | KU612740 | KU612762 |
| <i>H. sp. 13</i> | Cai173      | HKAS58838 | China: Yunnan Province, Jianchuan County                       | KU612616 | KU612675 | KU612738 | KU612760 |
| <i>H. sp. 13</i> | Feng752     | HKAS57481 | China: Yunnan Province, Yunlong County, Shitou                 | KU612615 |          |          |          |
| <i>H. sp. 13</i> | XB-2        | HKAS92346 | China: Chongqing, Nanchuan County, Jinfo Mountain              | KU612560 | KU612674 | KU612739 | KU612761 |
| <i>H. sp. 15</i> | Feng215     | HKAS55325 | China: Yunnan Province, Jingdong County, Ailao Mountain        | KU612613 |          |          |          |
| <i>H. sp. 15</i> | Zhao131     | HKAS93259 | China: Yunnan Province, Mengla County                          | KU612612 | KU612683 | KU612745 | KU612803 |
| <i>H. sp. 15</i> | Cai9        | HKAS58676 | China: Yunnan Province                                         | KU612611 |          |          |          |

|                        |          |               |                                                                          |          |          |          |          |
|------------------------|----------|---------------|--------------------------------------------------------------------------|----------|----------|----------|----------|
| <i>H. sp. 15</i>       | Wang3503 | HKAS92336     | China: Yunnan Province, Simao District, Caiyanghe Natural Reserve        | KU612614 |          | KU612744 | KU612802 |
| <i>H. sp. 16</i>       | Feng87   | HKAS52807     | China: Yunnan Province, Yunlong County, Laojun Mountain                  | KU612609 |          | KU612748 | KU612801 |
| <i>H. sp. 16</i>       | GY3559   | HKAS92350     | China: Guizhou Province                                                  | KU612610 | KU612672 | KU612747 | KU612799 |
| <i>H. sp. 16</i>       | XB-3     | HKAS92347     | China: Chongqing, Nanchuan County, Jinfo Mountain                        |          | KU612652 | KU612749 | KU612800 |
| <i>H. sp. 16</i>       | GY153    | HKAS92349     | China: Guizhou Province                                                  |          | KU612671 | KU612746 | KU612798 |
| <i>H. sp. 17</i>       | —        | PDD93275      | New Zealand: Auckland, Hunua, Workman Road, Workman Track                | KU612624 |          |          | KU612806 |
| <i>H. sp. 17</i>       | —        | PDD98029      | New Zealand: Wairarapa Tararua Forest Park, Mt. Holdsworth               | KU612623 | KU612690 |          |          |
| <i>H. sp. 17</i>       | —        | PERTH07830742 | Australia: Denmark, William Bay National Park                            | KU612622 | KU612689 |          |          |
| <i>H. sp. 17</i>       | —        | PERTH08072957 | Australia: About 100m south of Rosa Brook, near Marganet River           | KU612621 |          |          |          |
| <i>H. sp. 17</i>       | GD1588   | —             | Australia: Tasmania, Pipeline track, Mt. Wellington                      | KU612620 | KU612688 | KU612752 | KU612805 |
| <i>H. sp. 18</i>       | —        | PDD94968      | New Zealand: Dunedin, Leith Valley, Swampy Spur                          | KU612627 |          |          |          |
| <i>H. sp. 18</i>       | GD1590   | —             | Australia: Tasmania, Shinglebend, Styx River, Styx Valley                | KU612629 | KU612686 | KU612754 | KU612809 |
| <i>H. sp. 18</i>       | GD1589   | —             | Australia: Tasmania, Shinglebend, Styx River, Styx Valley                | KU612628 | KU612687 | KU612753 | KU612808 |
| <i>H. sp. 19</i>       | —        | PERTH07608543 | Australia: Dwellingup, Amphion Forest Block, Murray River Road           | KU612641 |          |          |          |
| <i>H. sp. 19</i>       | —        | PERTH08018413 | Australia: Denmark, Loc 406, 8km west of Denmark                         | KU612642 | KU612696 |          |          |
| <i>H. sp. 19</i>       | —        | PERTH08091676 | Australia: Denmark, Mt. Romance Farm, Tindale Road                       | KU612640 |          |          |          |
| <i>H. sp. 19</i>       | —        | PERTH08093865 | Australia: Augusta, West Bay bushland, Leeuwin-Naturaliste National Park | KU612643 | KU612695 | KU612751 | KU612804 |
| <i>H. umbilicatum</i>  | Wang3312 | HKAS92335     | USA: California, Mendocino                                               | KU612608 | KU612678 | KU612727 | KU612792 |
| <i>H. vesterholtii</i> | Li1359   | HKAS56213     | China: Yunnan Province, Yulong County, Yulong Snow Mountain              | KU612554 |          |          |          |
| <i>H. vesterholtii</i> | Feng194  | HKAS52915     | China: Yunnan Province, Shangeri-La County, Haba Snow Mountain           | KU612553 |          |          |          |
| <i>H. vesterholtii</i> | Feng288  | HKAS55399     | China: Yunnan Province, Yulong County, Yulong Snow Mountain              | KU612555 |          |          |          |
| <i>H. vesterholtii</i> | Feng290  | HKAS55401     | China: Yunnan Province, Yulong County, Yulong Snow Mountain              | KU612552 |          |          |          |
| <i>H. vesterholtii</i> | Tang1090 | HKAS57047     | China: Yunnan Province, Nanhua County, Maan Mountain                     | KU612558 |          |          |          |

|                             |          |           |                                                                     |          |          |          |          |
|-----------------------------|----------|-----------|---------------------------------------------------------------------|----------|----------|----------|----------|
| <i>H. vesterholtii</i>      | Cai67    | HKAS58734 | China: Yunnan Province, Yongping County                             | KU612559 |          |          |          |
| <i>H. vesterholtii</i>      | Feng27   | HKAS51086 | China: Yunnan Province, Shangeri-La County, Hongshan                | KU612557 | KU612650 | KU612707 |          |
| <i>H. vesterholtii</i>      | Shi656   | HKAS92341 | China: Shaanxi Province, Mei County, Yingtou                        | KU612562 | KU612647 | KU612709 | KU612790 |
| <i>H. vesterholtii</i>      | Shi688   | HKAS92342 | China: Yunnan Province, Yulong County, Yulong Snow Mountain         | KU612564 | KU612646 | KU612705 | KU612786 |
| <i>H. vesterholtii</i>      | Shi685   | HKAS92343 | China: Sichuan Province, Puge County, Luoji Mountain                | KU612563 | KU612648 | KU612710 |          |
| <i>H. vesterholtii</i>      | Shi645   | HKAS92344 | China: Heilongjiang Province, on the way from Jiagedaqi to Songling | KU612556 | KU612649 | KU612706 | KU612788 |
| <i>H. vesterholtii</i>      | Feng961  | HKAS74441 | China: Yunnan Province, Gongshan County, Bingzhongluo               | KU612551 |          |          |          |
| <i>H. vesterholtii</i>      | Qin483   | HKAS77884 | China: Hubei Province, Yichang, Shennongjia                         | KU612565 | KU612645 | KU612704 | KU612787 |
| <i>H. vesterholtii</i>      | Yang4991 | HKAS56489 | Germany                                                             | KU612561 |          |          |          |
| <i>H. vesterholtii</i>      | GY8125   | HKAS92351 | China: Guizhou Province                                             |          | KU612651 | KU612708 | KU612789 |
| <i>S. aff. subconfluens</i> | Feng127  | HKAS52848 | China: Yunnan Province, Shangeri-La County, Geza                    |          | KU612697 | KU612757 | KU612813 |
| <i>S. aff. subconfluens</i> | Feng197  | HKAS52918 | China: Yunnan Province, Shangeri-La County, Haba Snow Mountain      |          | KU612698 | KU612758 | KU612814 |

Abbreviations: *H.* = *Hydnum*; *S.* = *Sistotrema*

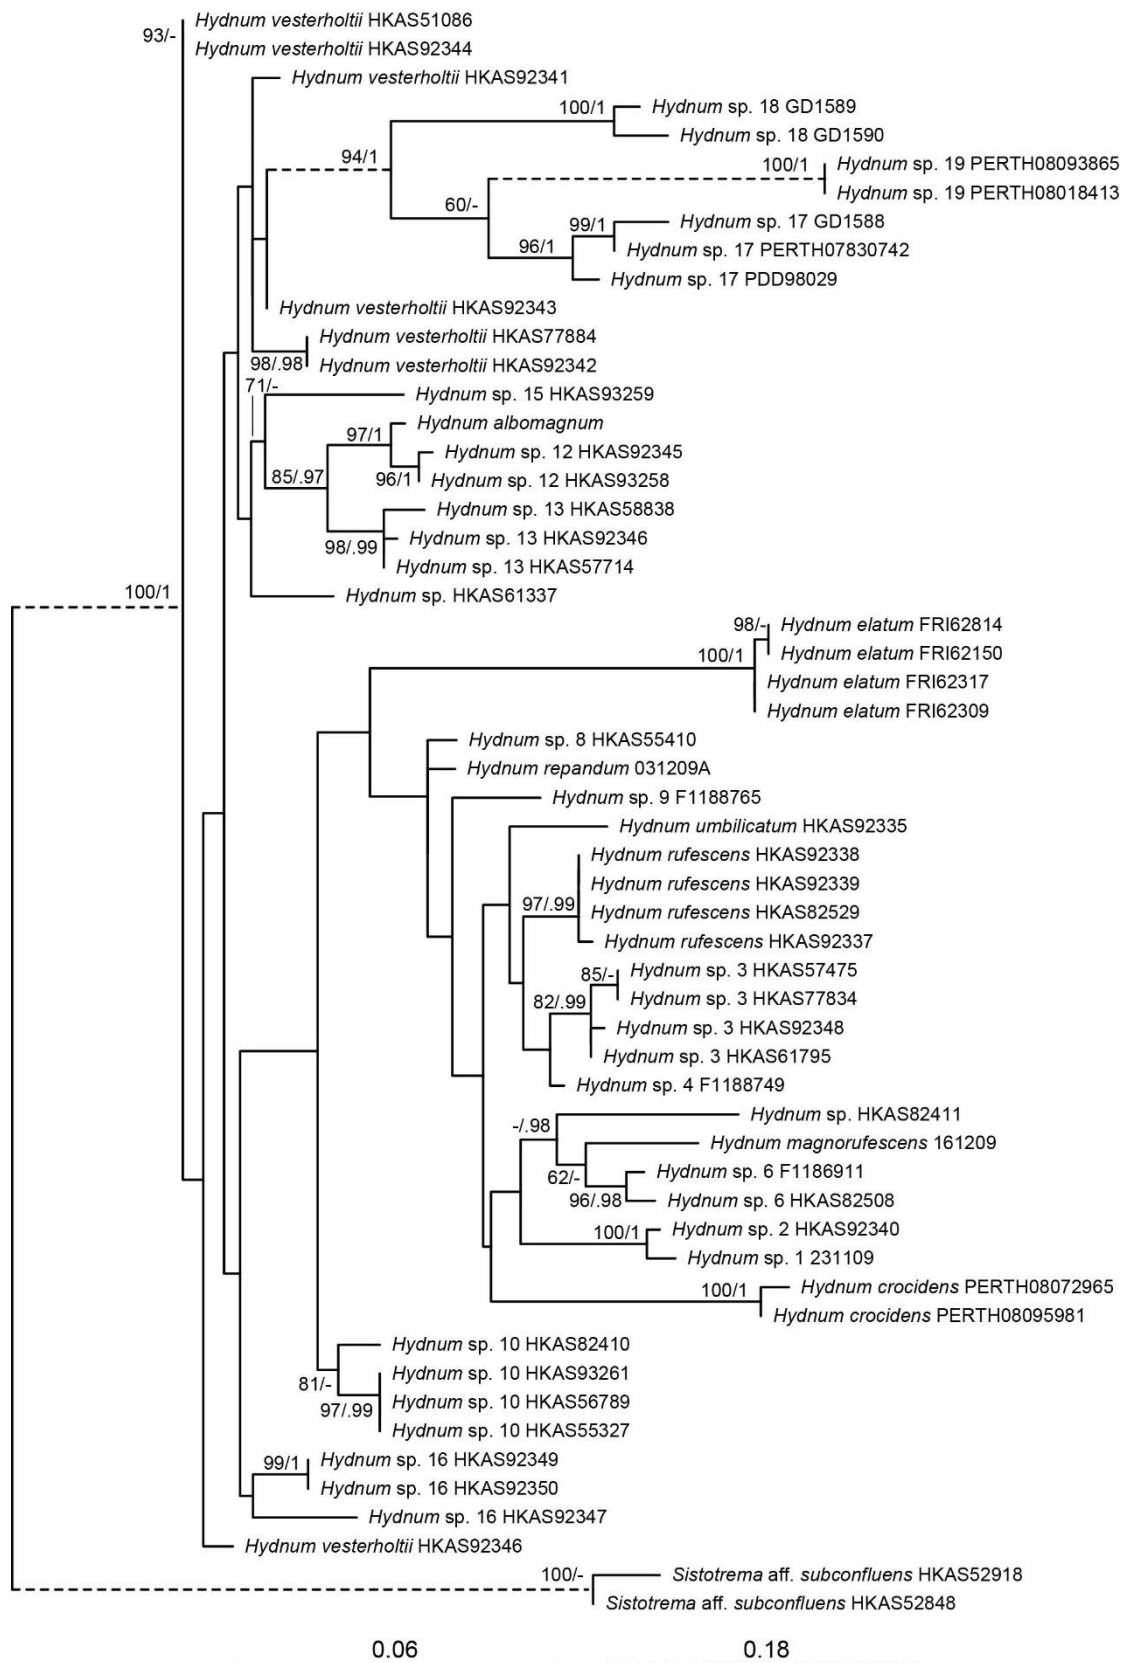

Fig. S1 Phylogenetic tree inferred from the Maximum Likelihood (ML) analysis based on the nrLSU dataset. Bootstrap values (ML)/posterior possibilities (from Bayesian Inference) are shown above or beneath individual branches. Only bootstrap values larger than 60 and posterior probabilities over 0.95 are shown.



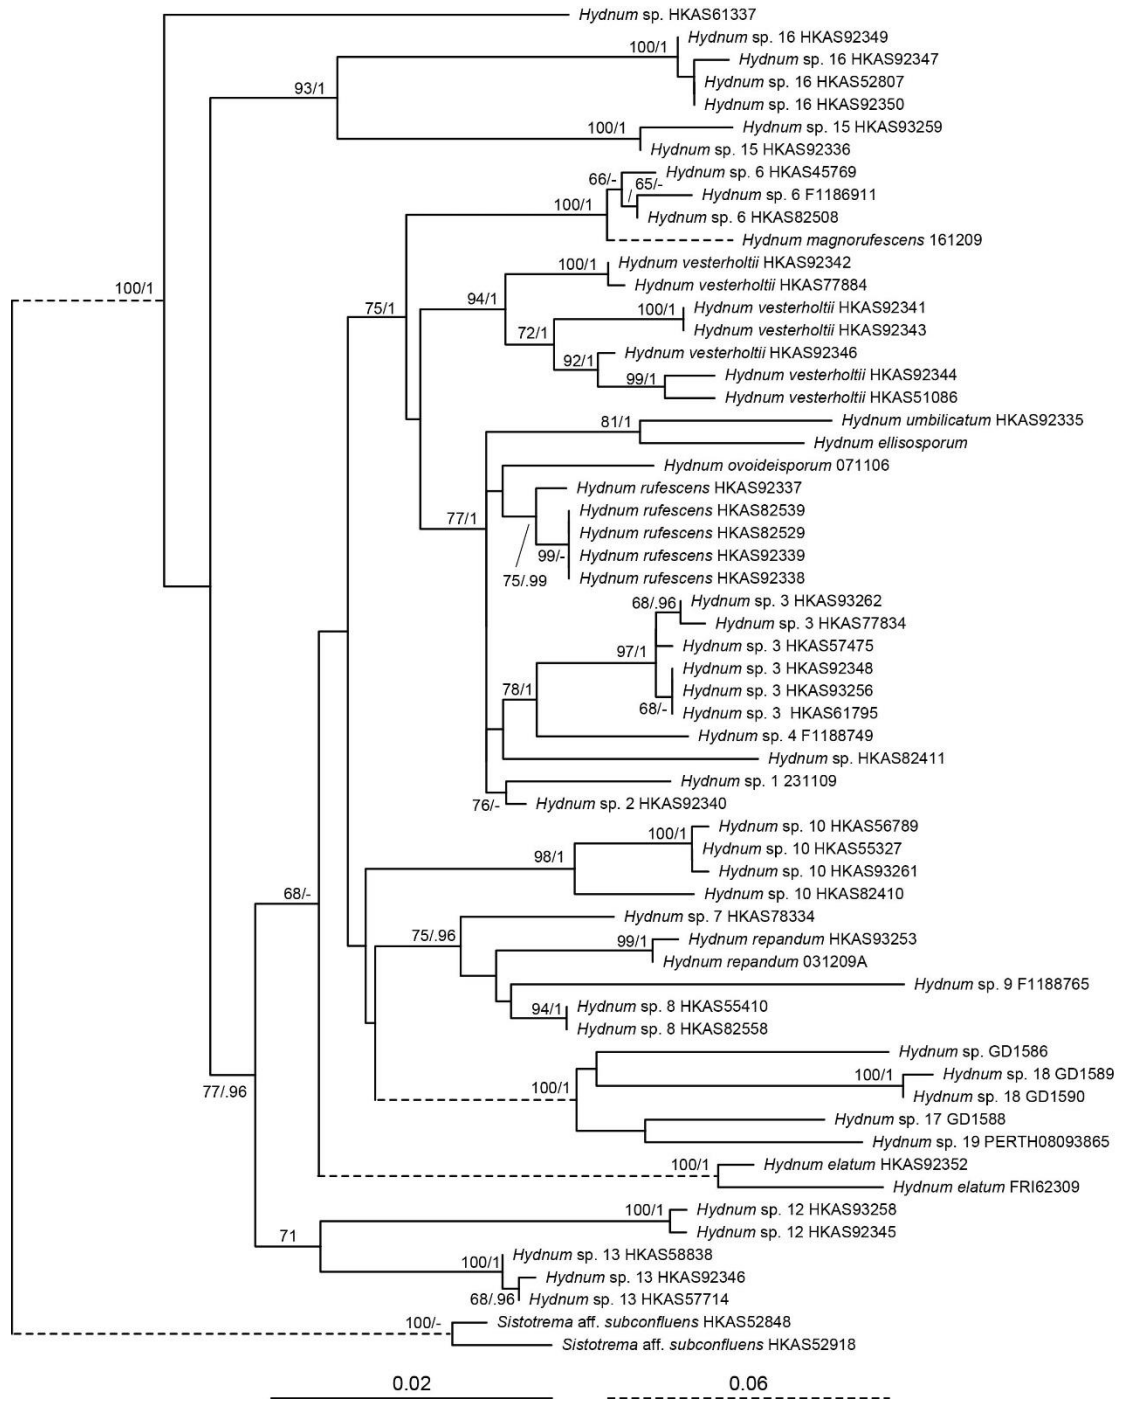

Fig. S2 Phylogenetic tree inferred from the Maximum Likelihood (ML) analysis based on the *rpb1* dataset. Bootstrap values (ML)/posterior possibilities (from Bayesian Inference) are shown above or beneath individual branches. Only bootstrap values larger than 60 and posterior probabilities over 0.95 are shown.

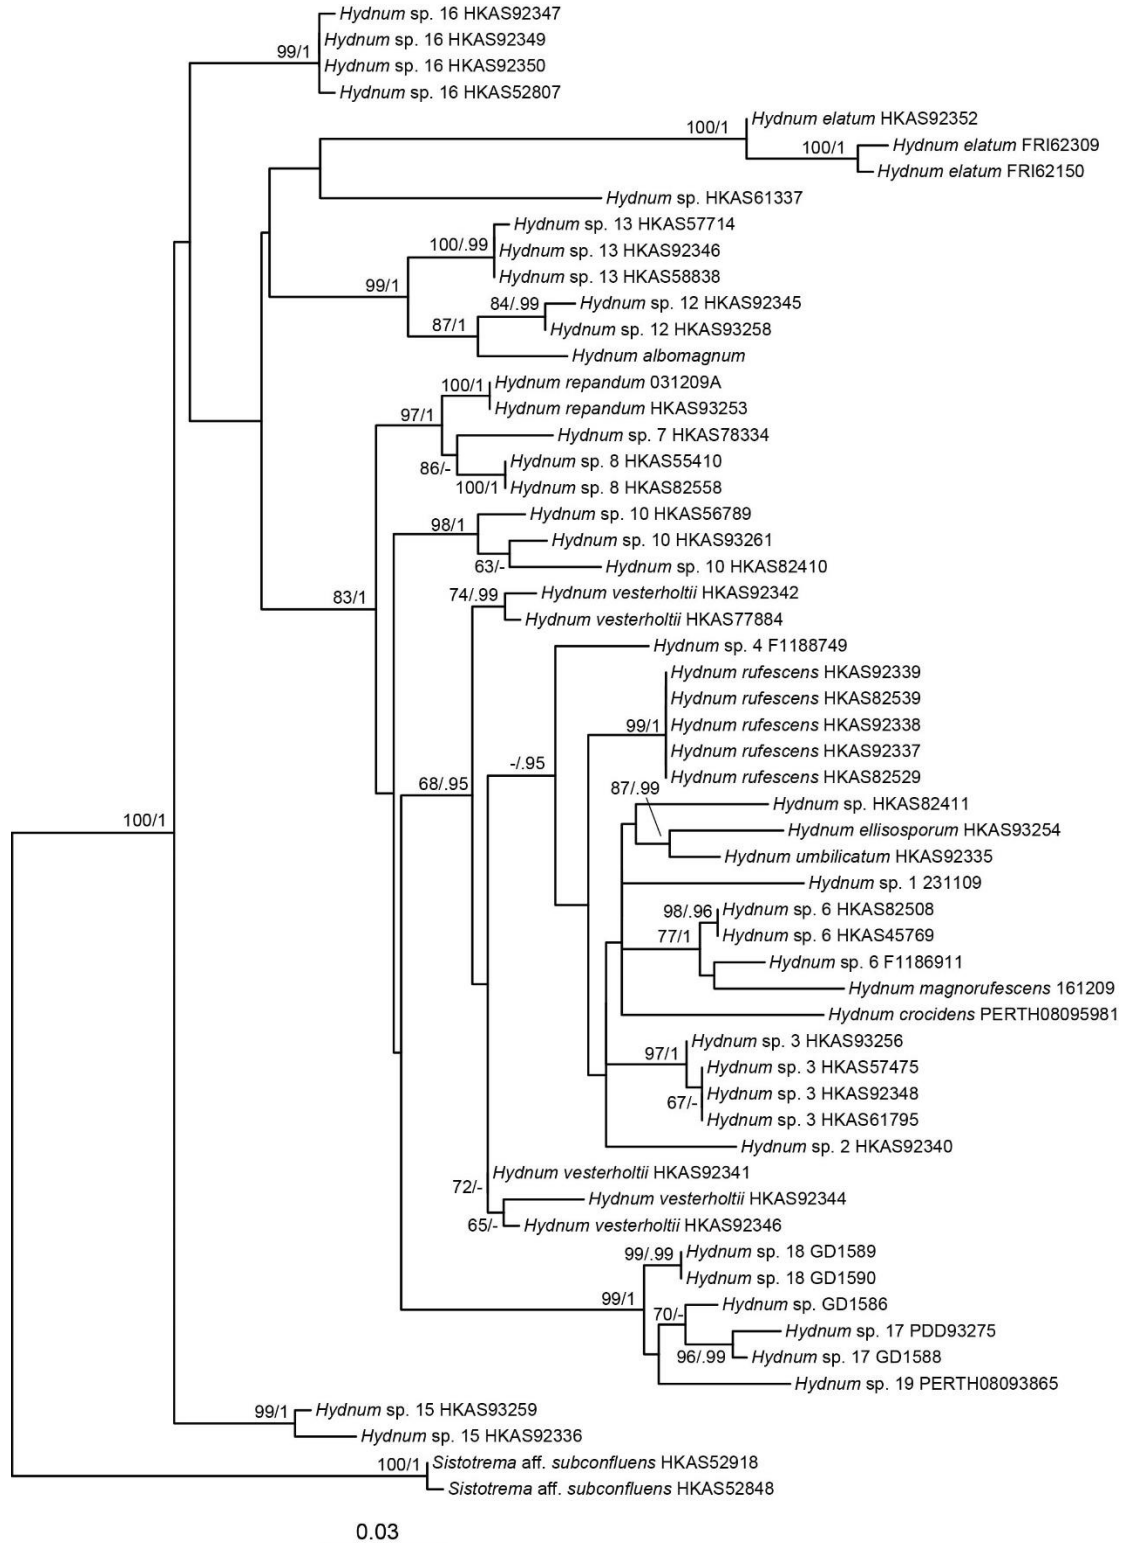

Fig. S3 Phylogenetic tree inferred from the Maximum Likelihood (ML) analysis based on the *tefla* dataset. Bootstrap values (ML)/posterior possibilities (from Bayesian Inference) are shown above or beneath individual branches. Only bootstrap values larger than 60 and posterior probabilities over 0.95 are shown.
